# Supplementary material for: Plasma metabolic profiles predict future dementia and dementia subtypes: a prospective analysis of 274,160 participants
Source: PubMed Central journal article supplement (PMC10802055; doi:10.1186/s13195-023-01379-3), 2024-01-22

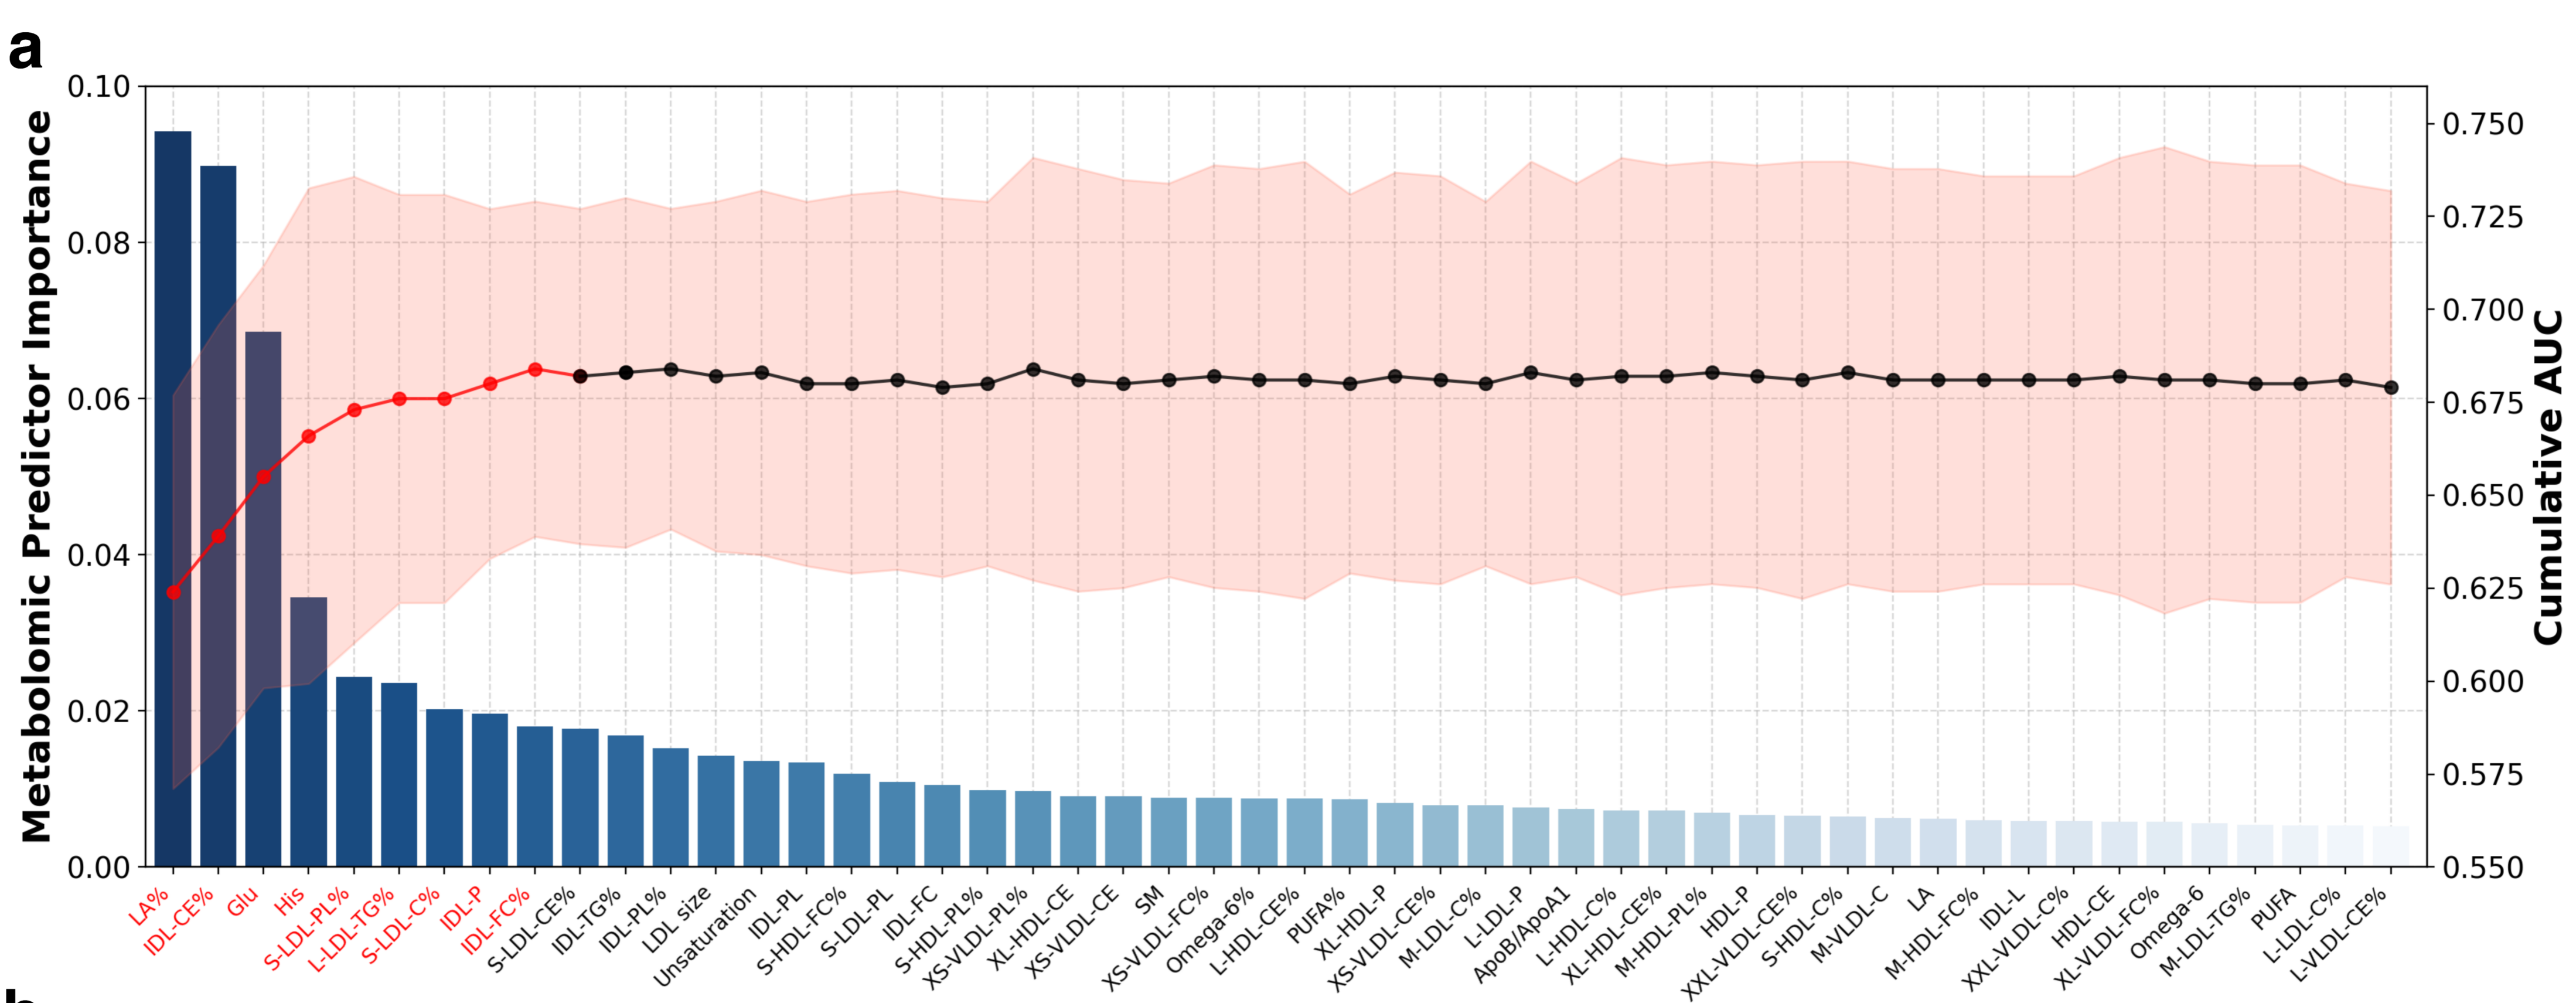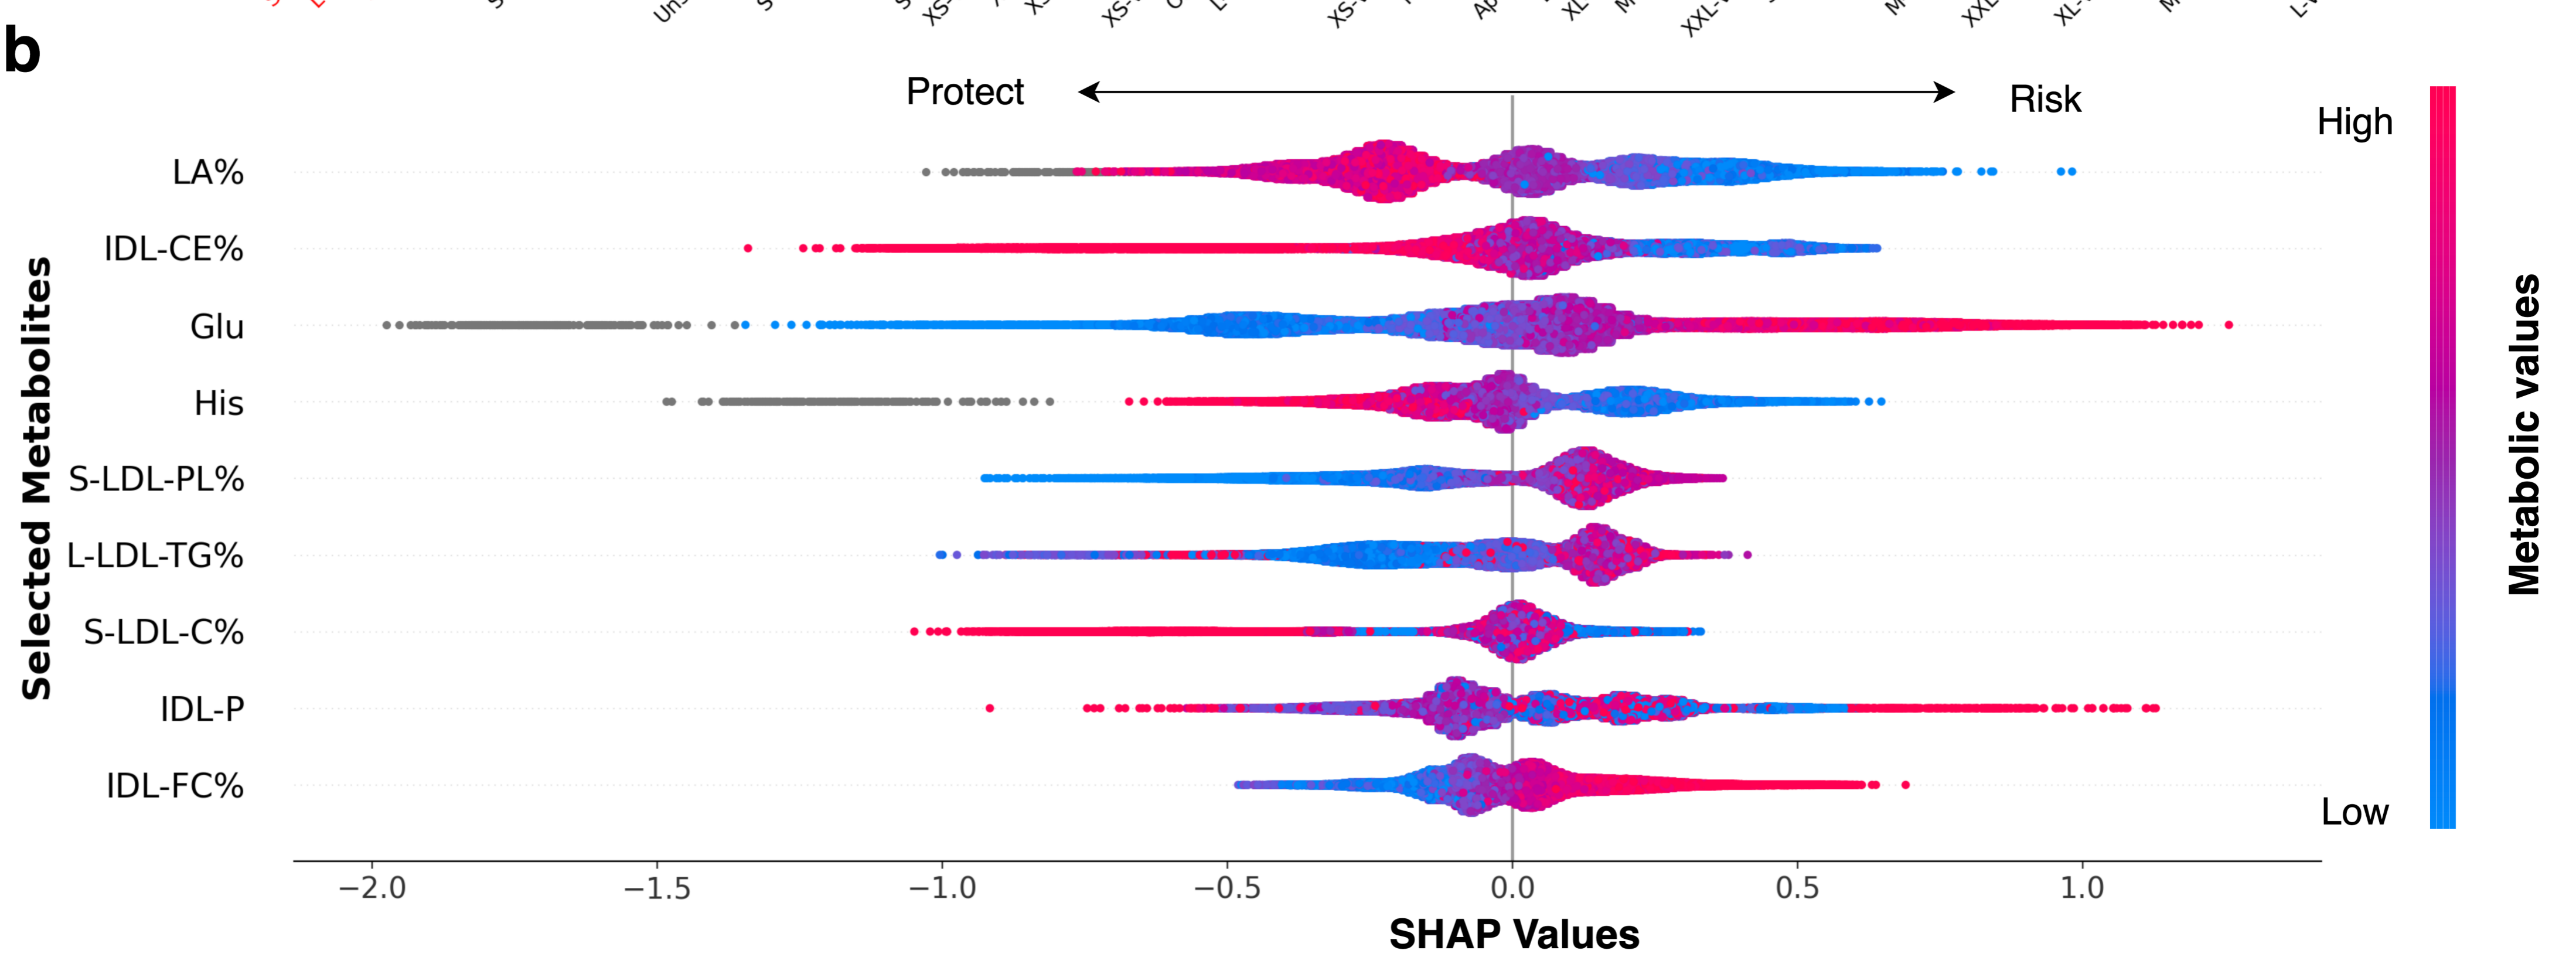

Supplement: 13195_2023_1379_MOESM3_ESM.pdf [file 13195_2023_1379_MOESM3_ESM.pdf]
